# Supplementary material for: Neighborhood Socioeconomic Resources and Crime-Related Psychosocial Hazards, Stroke Risk, and Cognition in Older Adults
Source: MDPI journal article supplement (doi:10.3390/ijerph18105122), 2021-05-12
Supplement: s1 [file s1]

Supplemental Table S1. Pearson correlations of socioeconomic resources and FSRP-10

|                                        | FSRP-10       |
|----------------------------------------|---------------|
| % below poverty level                  | -0.08, p=0.42 |
| Median household income                | 0.08, p=0.43  |
| % with less than 12 years of education | -0.16, p=0.09 |
| % with 16+ years of education          | 0.22, p=0.02  |
| % unemployment                         | -0.07, p=0.45 |

Abbreviations: FSRP-10 = Framingham Stroke Risk Profile score 10-year risk of stroke; % = percent.
